# Supplementary material for: Antiviral treatment in outpatients with herps zoster in six major areas of China, 2010–2019
Source: Frontiers journal article supplement (doi:10.3389/fpubh.2022.942377), 2022-07-29
Supplement: Data_Sheet_1.PDF [file Data_Sheet_1.PDF]

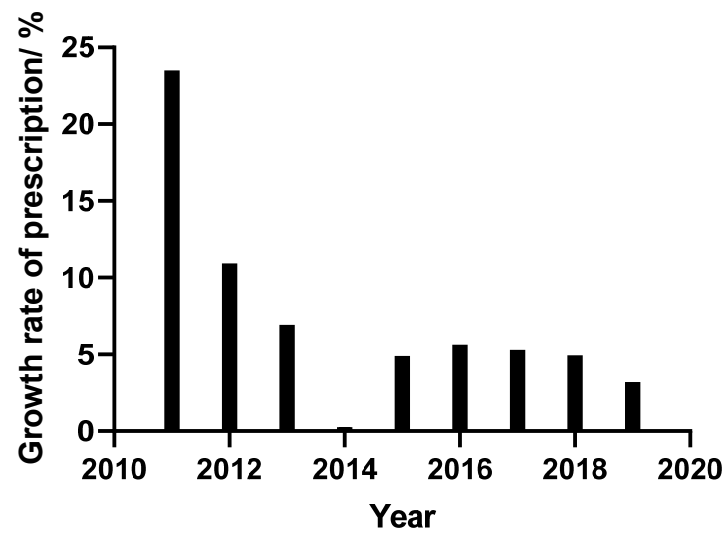

Fig. S1 Growth rate of prescription in each year
